# Supplementary material for: Activated platinum in gallium-based room-temperature liquid metals for enhanced reduction reactions
Source: RSC Adv. 2023 Oct 16;13(43):30273–80. doi: 10.1039/d3ra06571e (PMC10577643; doi:10.1039/d3ra06571e)
Supplement: RA-013-D3RA06571E-s002 [file RA-013-D3RA06571E-s002.pdf]

## **Supporting Information**

### **Activated platinum in gallium-based room-temperature liquid metals for enhanced reduction reaction**

Nichayanan Manyuan and Hideya Kawasaki\*

Department of Chemistry and Materials Engineering, Kansai University, 3-3-35,  
Yamate-cho, Suita, Osaka 564-8680, Japan.

\*Corresponding author: E-mail: [hkawa@kansai-u.ac.jp](mailto:hkawa@kansai-u.ac.jp)

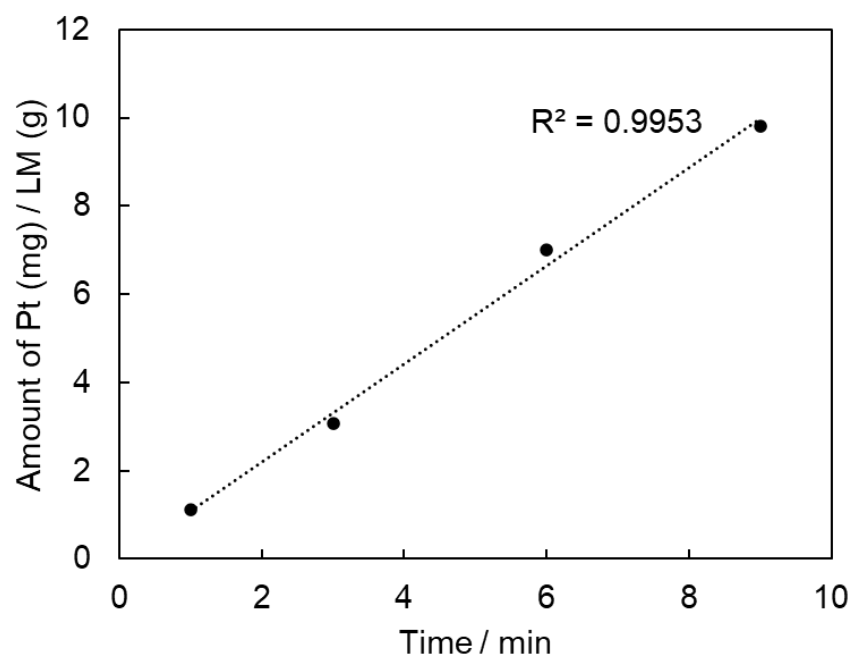

**Figure S1** Calibration curve of the Pt loading at different sputtered time.

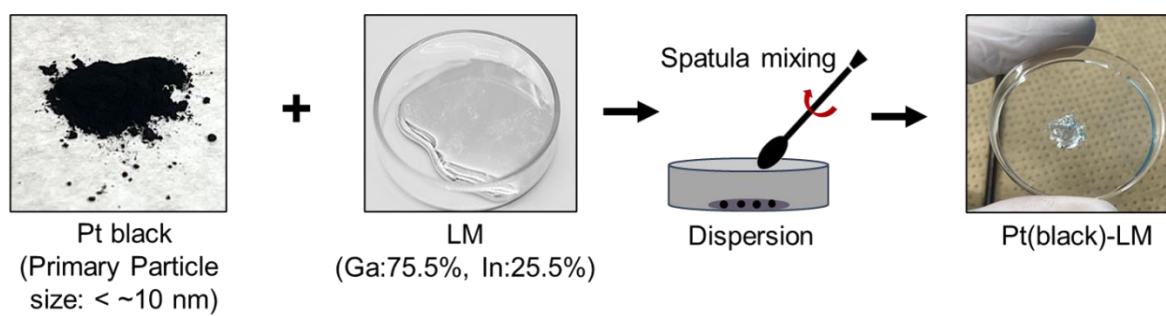

**Figure S2** Schematic illustration of the fabrication of Pt(black)-LM via Pt black mixing.

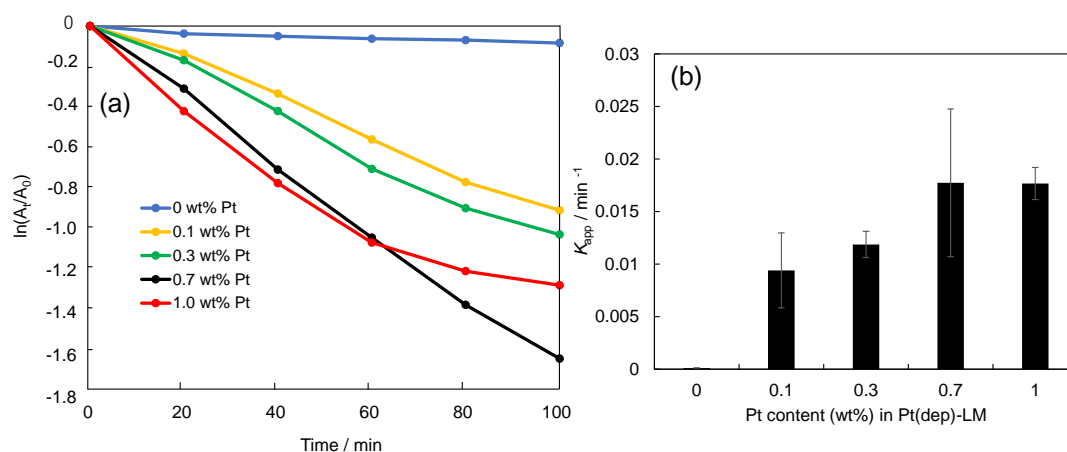

**Figure S3** (a) Time-dependent reduction of MB in an acidic aqueous solution (0.1 M HCl) in the presence of Pt(dep)-LM with the different Pt content (wt %) and (b) comparison of the different Pt content (wt %) in Pt(dep)-LM on MB reduction rate.

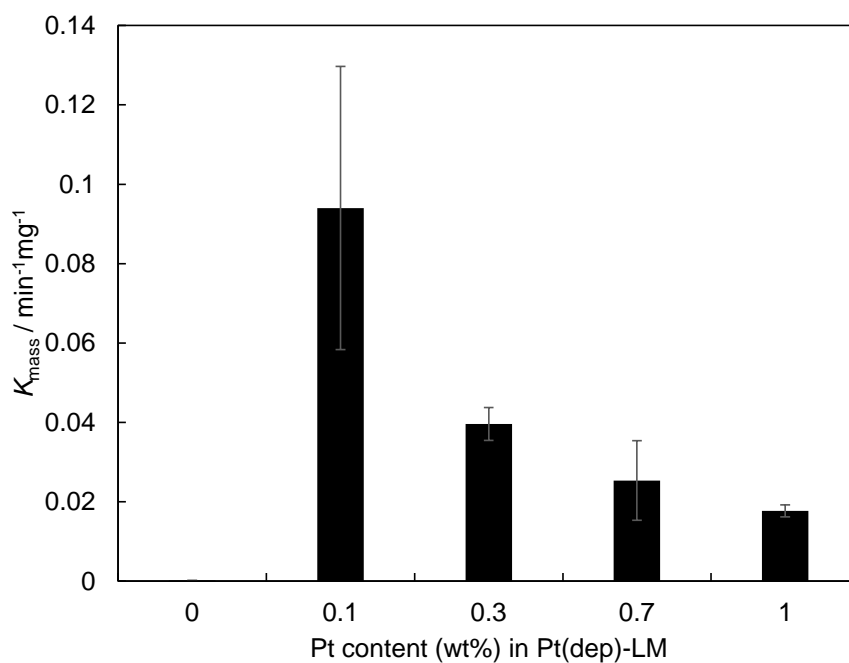

**Figure S4** Comparison of the different Pt content in Pt(dep)-LM on MB reduction rate per Pt mass ( $K_{mass}$ ).

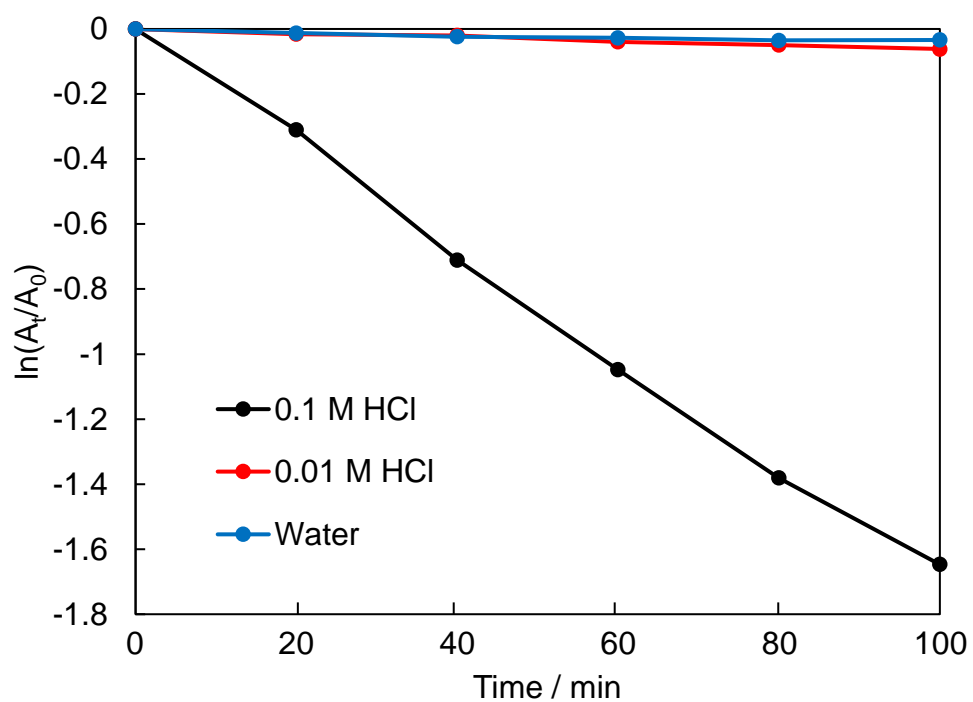

**Figure S5** Comparison of MB reduction rate in different HCl solution including 0.1M HCl, 0.01 HCl, and water.

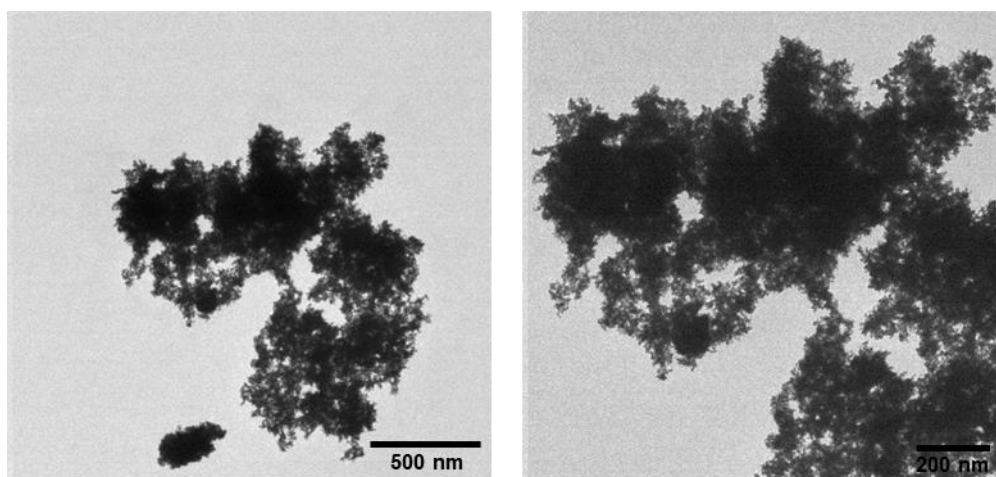

**Figure S6** TEM images of Pt black.

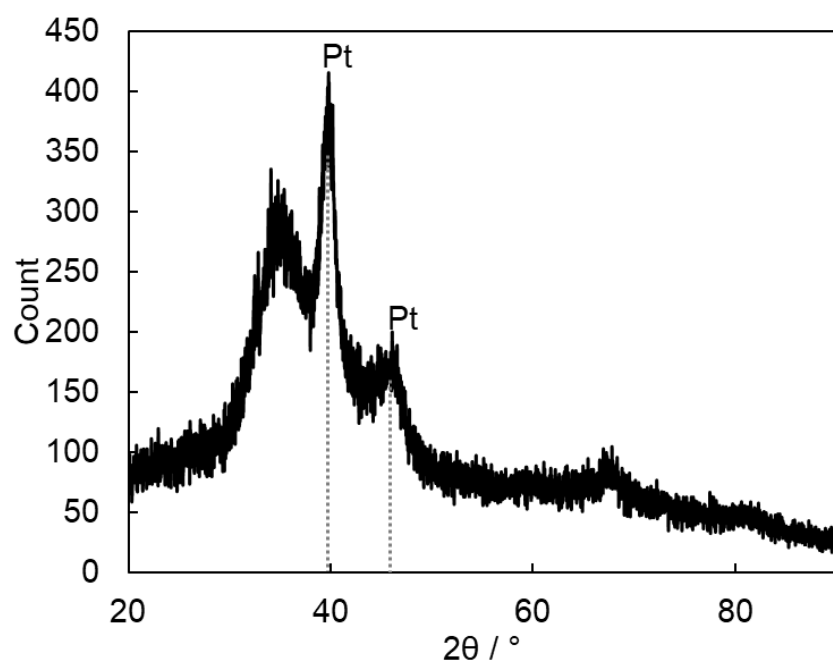

**Figure S7** XRD patterns of Pt(dep)-LM obtained by sputtering onto the LM surface for 6 min (1 min x 6 times).

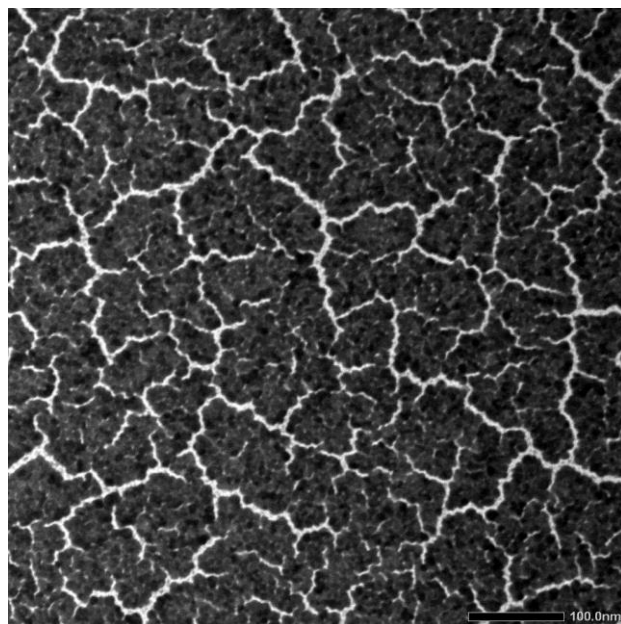

**Figure S8** TEM images of Pt obtained by sputtering onto TEM grids for 1 min.

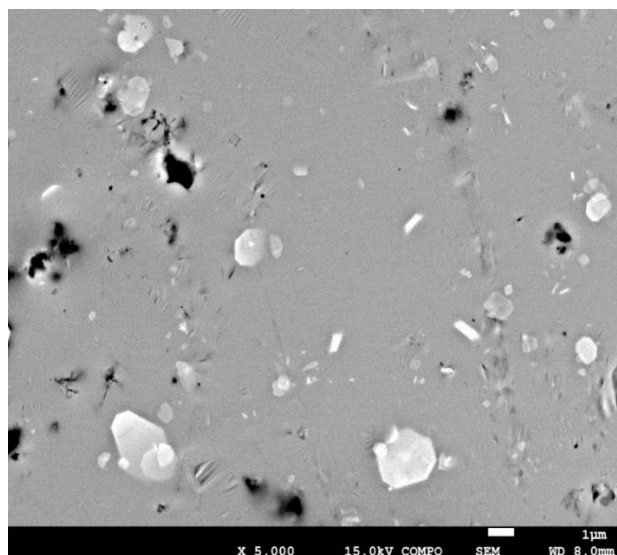

**Figure S9** FE-SEM image of Pt(dep)-LM.

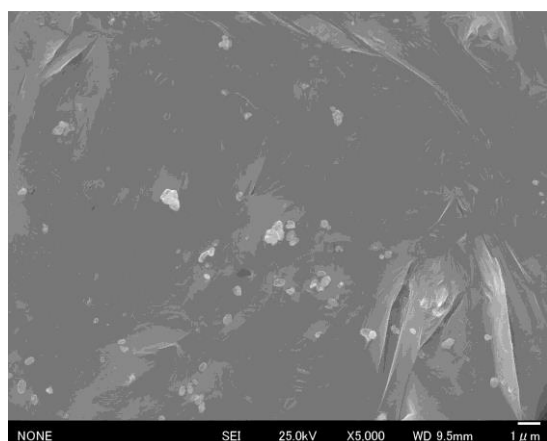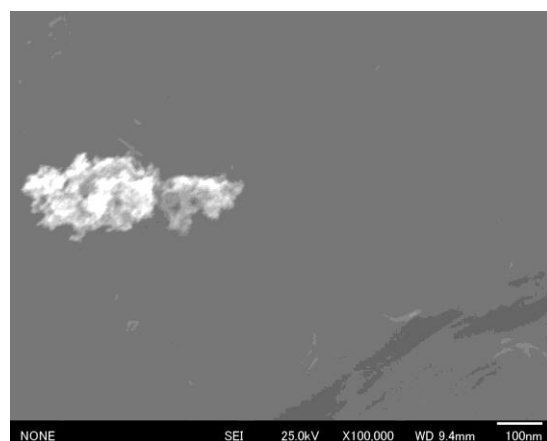

**Figure S10** FE-SEM images of Pt(black)-LM.

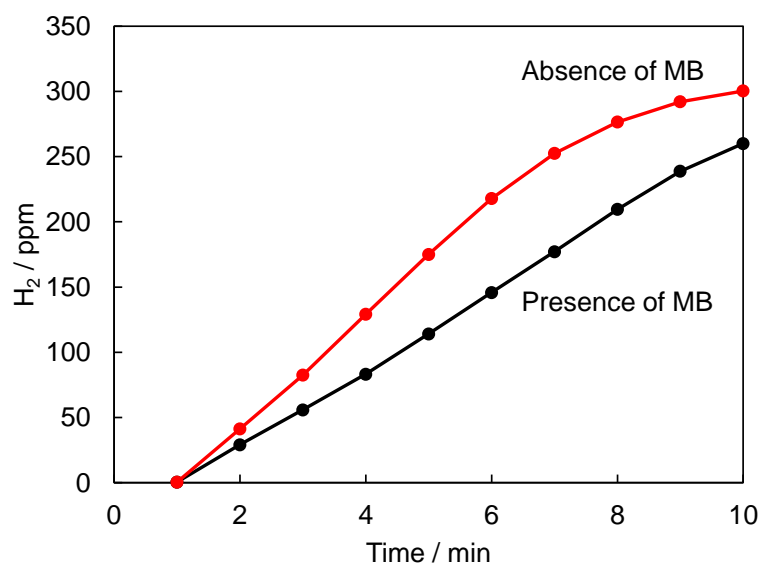

**Figure S11** Comparison of the hydrogen production rate of Pt(dep)-LM in the presence and the absence of MB.

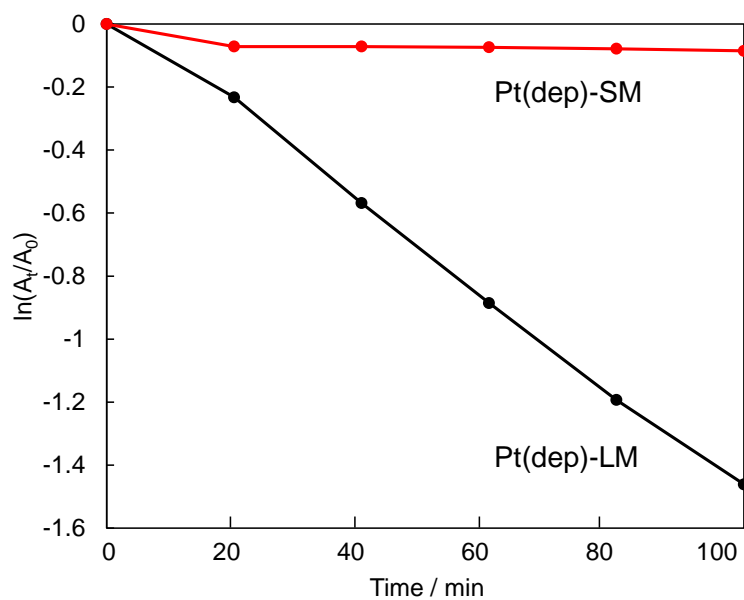

**Figure S12** Comparison of MB reduction between Pt(dep)-LM and Pt(dep)-SM.
